# Supplementary material for: Effects of multiple sclerosis on the audio-vestibular system: a systematic review
Source: HighWire-hosted journal article supplement (doi:10.1136/bmjopen-2021-060540), 2022-08-01
Supplement: bmjopen-2021-060540supp001_data_supplement.pdf [file bmjopen-2021-060540supp001_data_supplement.pdf]

Gür, Binkhamis, Kluk (2022)

MS &amp; Audio-Vestibular System: Systematic Review

## Supplement

### Section I: Literature Search Strategy

**Database searched: Scopus**

**Date of coverage: 2000 to November 2021**

**Search undertaken: August 2020, September 2020, February 2021, November 2021**

((TITLE-ABS-KEY("multiple sclerosis")AND (hearing OR auditory OR "hearing loss" OR "auditory function" OR "hearing dysfunction")) OR (TITLE-ABS-KEY("multiple sclerosis") AND (dizziness OR vestibular OR vertigo OR equilibrium OR balance OR balanced OR "vestibular function" )

Gür, Binkhamis, Kluk (2022)

MS &amp; Audio-Vestibular System: Systematic Review

**Database searched: Pubmed****Date of coverage: 2000 to November 2021****Search undertaken: August 2020, September 2020, February 2021, November 2021**

("multiple sclerosis"[MeSH Terms] AND ("auditorially"[All Fields] OR "auditory"[All Fields] OR ("hearing"[MeSH Terms] OR "hearing"[All Fields] OR "hearings"[All Fields]) OR "hearing loss"[All Fields] OR "hearing" [All Fields] OR "auditory function"[All Fields]) OR ("multiple sclerosis"[MeSH Terms] AND ("vestibular"[All Fields] OR ("dizziness"[MeSH Terms] OR "dizziness"[All Fields] OR "dizzy"[All Fields] OR "vertigo"[MeSH Terms] OR "vertigo"[All Fields]) OR ("vertigo"[MeSH Terms] OR "vertigo"[All Fields] OR "vertigos"[All Fields] OR "vertigoes"[All Fields]) OR ("equilibrium"[All Fields] OR "equilibriums"[All Fields]) OR ("balance"[All Fields] OR "balanced"[All Fields] OR "balances"[All Fields] OR "balancing"[All Fields]) OR "vestibular function"[All Fields]) AND

**Translations****Multiple Sclerosis[MeSH Terms]:** "multiple sclerosis"[MeSH Terms]**auditory:** "auditorially"[All Fields] OR "auditory"[All Fields]**hearing:** "hearing"[MeSH Terms] OR "hearing"[All Fields] OR "hearings"[All Fields]**multiple sclerosis[MeSH Terms]:** "multiple sclerosis"[MeSH Terms]**dizziness:** "dizziness"[MeSH Terms] OR "dizziness"[All Fields] OR "dizzy"[All Fields] OR "vertigo"[MeSH Terms] OR "vertigo"[All Fields]**vertigo:** "vertigo"[MeSH Terms] OR "vertigo"[All Fields] OR "vertigos"[All Fields] OR "vertigoes"[All Fields]**equilibrium:** "equilibrium"[All Fields] OR "equilibriums"[All Fields]**balance:** "balance"[All Fields] OR "balanced"[All Fields] OR "balances"[All Fields] OR "balancing"[All Fields]

Gür, Binkhamis, Kluk (2022)

MS &amp; Audio-Vestibular System: Systematic Review

**Database searched: Web of Science****Date of coverage: 2000 to November 2021****Search undertaken: August 2020, September 2020, February 2021, November 2021**

*Databases= WOS, BCI, BIOSIS, CCC, DRCI, DIIDW, KJD, MEDLINE, RSCI, SCIELO, ZOOREC, Timespan=2000-2021*

- #1 TS=("multiple sclerosis")
- #2 TS=(auditory OR audio OR "auditory function" OR "auditory system")
- #3 TS=(hear\* OR hearing OR "hearing loss")
- #4 #2 OR #3
- #5 #4 AND #1
- #6 TS=(vestibular OR vestibul\* OR "vestibular dysfunction" OR "vestibular system")
- #7 TS=(vertigo)
- #8 TS=(dizzy OR dizziness)
- #9 TS=(balance OR balanced OR balances OR balanc\*)
- #10 #6 OR #7 OR #8 OR #9
- #11 #1 AND #10
- #12 #5 OR #11 AND

Gür, Binkhamis, Kluk (2022)

MS & Audio-Vestibular System: Systematic Review

**Database searched: NICE**

**Date of coverage: 2000 to November 2021**

**Search undertaken: August 2020, September 2020, February 2021, November 2021**

("multiple sclerosis") AND (hearing OR auditory OR "hearing loss" OR "auditory function" OR hear\* OR "hearing dysfunction") OR (("multiple sclerosis") AND (dizziness OR vestibular OR vertigo OR equilibrium OR balance OR balanced OR "vestibular function"))

## Section II: Assessment of Bias

**Table S1:** Assessment of Bias for case-control studies according to RoBANs

| Year | Author                                  | Selection of participants | Confounding Variables | Measurement of Exposure | Blinding of the Outcome of the Assessment | Incomplete Outcome of Data | Selective Outcome Reporting |
|------|-----------------------------------------|---------------------------|-----------------------|-------------------------|-------------------------------------------|----------------------------|-----------------------------|
| 2002 | Japaridze et al. <sup>[1]</sup>         | ?                         | +                     | +                       | -                                         | +                          | +                           |
| 2002 | Sartucci and Logi <sup>[2]</sup>        | +                         | +                     | +                       | -                                         | +                          | +                           |
| 2004 | Alpini et al. <sup>[3]</sup>            | -                         | ?                     | +                       | -                                         | +                          | +                           |
| 2005 | Aidar and Suzuki <sup>[4]</sup>         | +                         | +                     | +                       | -                                         | +                          | -                           |
| 2007 | Patkó et al. <sup>[5]</sup>             | ?                         | -                     | +                       | -                                         | +                          | +                           |
| 2008 | Zeigelboim et al. <sup>[6]</sup>        | ?                         | +                     | +                       | -                                         | +                          | +                           |
| 2009 | Lima et al. <sup>[7]</sup>              | ?                         | ?                     | +                       | -                                         | +                          | +                           |
| 2010 | Lewis et al. <sup>[8]</sup>             | +                         | +                     | +                       | -                                         | +                          | +                           |
| 2010 | Matas et al. <sup>[9]</sup>             | +                         | +                     | +                       | -                                         | +                          | +                           |
| 2012 | Doty et al. <sup>[10]</sup>             | -                         | +                     | +                       | -                                         | +                          | +                           |
| 2012 | Saberi et al. <sup>[11]</sup>           | +                         | +                     | +                       | -                                         | +                          | +                           |
| 2013 | Gabelić et al. <sup>[12]</sup>          | +                         | +                     | +                       | -                                         | +                          | +                           |
| 2013 | Harirchian et al. <sup>[13]</sup>       | +                         | +                     | +                       | -                                         | +                          | +                           |
| 2014 | Valadbeigi et al. <sup>[14]</sup>       | +                         | +                     | +                       | -                                         | +                          | +                           |
| 2015 | Pokryszko-Dragan et al. <sup>[15]</sup> | +                         | +                     | +                       | -                                         | +                          | +                           |
| 2018 | Doty et al. <sup>[16]</sup>             | -                         | +                     | +                       | -                                         | +                          | +                           |
| 2018 | Kavasoglu et al. <sup>[17]</sup>        | +                         | ?                     | +                       | -                                         | +                          | +                           |
| 2018 | Koura et al. <sup>[18]</sup>            | +                         | +                     | +                       | -                                         | +                          | +                           |
| 2019 | Elbeltagy et al. <sup>[19]</sup>        | -                         | +                     | +                       | -                                         | +                          | +                           |
| 2021 | Rishiq et al. <sup>[20]</sup>           | ?                         | +                     | +                       | -                                         | +                          | +                           |
| 2021 | Srinivasan et al. <sup>[21]</sup>       | +                         | +                     | +                       | -                                         | +                          | +                           |
| 2021 | Elmoazen et al. <sup>[22]</sup>         | +                         | +                     | +                       | -                                         | +                          | +                           |

Green “+” = low risk of bias, red “-” = high risk of bias, yellow “?” = unclear risk of bias.

Gür, Binkhamis, Kluk (2022)

MS &amp; Audio-Vestibular System: Systematic Review

**Table S2:** Risk of bias assessment of cohort studies by the Newcastle-Ottawa Quality Assessment form for cohort studies.

| Year | Author                               | Representativeness of exposed cohort | Selection of non-exposed cohort | Ascertainment of exposure | Outcome of interest not present at the beginning | Comparability of cohorts/confounders | Assessment of the outcome | Follow-up Length | Adequacy of follow-up of cohorts | Study quality |
|------|--------------------------------------|--------------------------------------|---------------------------------|---------------------------|--------------------------------------------------|--------------------------------------|---------------------------|------------------|----------------------------------|---------------|
| 2002 | Versino et al. <sup>[23]</sup>       | *                                    | n/a                             | *                         | *                                                | n/a                                  | -                         | n/a              | *                                | ?             |
| 2008 | Burina et al. <sup>[24]</sup>        | -                                    | n/a                             | *                         | n/a                                              | -                                    | -                         | -                | -                                | ?             |
| 2009 | Eleftheriadou et al. <sup>[25]</sup> | *                                    | -                               | *                         | *                                                | *                                    | -                         | *                | *                                | Poor          |
| 2010 | Degirmenci et al. <sup>[26]</sup>    | *                                    | -                               | *                         | *                                                | *                                    | *                         | *                | *                                | Good          |
| 2016 | Kaytanci et al. <sup>[27]</sup>      | -                                    | -                               | *                         | -                                                | *                                    | -                         | *                | *                                | Poor          |
| 2019 | Di Mauro et al. <sup>[28]</sup>      | *                                    | -                               | *                         | *                                                | *                                    | -                         | *                | *                                | Good          |

\* = low risk of bias, '-' = high risk of bias, "n/a" = the criteria does not apply to the paper, "?" = unknown quality of the paper due to the presence of "n/a" criteria.

**Table S3:** Risk of bias assessment of cross-sectional studies by the Newcastle-Ottawa Quality Assessment form which is adapted for cross-sectional studies.

| Year | Author                          | Representativeness of the sample | Sample Size | Non-respondents | Ascertainment of exposure (risk factor) | Comparability of groups/confounders | Assessment of the outcome | Statistical test | Study quality |
|------|---------------------------------|----------------------------------|-------------|-----------------|-----------------------------------------|-------------------------------------|---------------------------|------------------|---------------|
| 2015 | Parsa et al. <sup>[29]</sup>    | -                                | -           | -               | *                                       | *                                   | -                         | *                | Poor          |
| 2020 | Yang and Liu <sup>[30]</sup>    | *                                | -           | *               | *                                       | *                                   | -                         | *                | Good          |
| 2020 | Inojosa et al. <sup>[31]</sup>  | *                                | -           | *               | *                                       | *                                   | -                         | *                | Good          |
| 2020 | Inojosa et al. <sup>[32]</sup>  | *                                | -           | *               | *                                       | *                                   | -                         | *                | Good          |
| 2021 | Delphi et al. <sup>[33]</sup>   | -                                | -           | *               | *                                       | *                                   | -                         | *                | Good          |
| 2021 | Cochrane et al. <sup>[34]</sup> | *                                | -           | *               | *                                       | *                                   | -                         | *                | Good          |
| 2021 | Cochrane et al. <sup>[35]</sup> | *                                | -           | *               | *                                       | *                                   | -                         | *                | Good          |

\* = low risk of bias, '-' = high risk of bias.

Gür, Binkhamis, Kluk (2022)

MS &amp; Audio-Vestibular System: Systematic Review

### Section III: Multiple Sclerosis and Auditory Function

**Table S4. Characteristics of studies examining the effects of MS on auditory function**

| Test Battery                             | Author (Year)                                  | Study Type      | Sample Size |          | PwMS Mean Age (years)         | PwMS Age range (Years)         | % Female             | MS Type (sample size)                            | MS Duration Mean (range) years         | Results of PwMS compared to controls / normative data |                                            |
|------------------------------------------|------------------------------------------------|-----------------|-------------|----------|-------------------------------|--------------------------------|----------------------|--------------------------------------------------|----------------------------------------|-------------------------------------------------------|--------------------------------------------|
|                                          |                                                |                 | PwMS        | Controls |                               |                                |                      |                                                  |                                        |                                                       |                                            |
| ABR                                      | Japaridze et al. (2002) <sup>[11]</sup>        | Case-Control    | 40          | 33       | 30.5                          | 18-57                          | 77.5                 | ?                                                | ?                                      | 65% Abnormal                                          |                                            |
|                                          | Versino et al. (2002) <sup>[23]</sup>          | Cohort          | 65          | 18       | 35.5                          | 19-61                          | ?                    | ?                                                | ?                                      | 37.5% Abnormal                                        |                                            |
|                                          | Burina et al. (2008) <sup>[24]</sup>           | Cohort          | 60          | NA       | 37.2                          | ?                              | 68.3                 | RRMS                                             | ?                                      | 95% Abnormal                                          |                                            |
|                                          | Eleftheriadou et al. (2009) <sup>[25]</sup>    | Cohort          | 46          | 40       | 40                            | 20-66                          | 45.6                 | RRMS                                             | 4.6                                    | 26% Abnormal                                          |                                            |
|                                          | Lima et al. (2009) <sup>[7]</sup>              | Case-control    | 25          | NA       | 42.6 (female)<br>38 (male)    | 33-53 (female)<br>24-56 (male) | 64.0                 | RRMS (14), PPMS (8), Unspecified Progressive (3) | ?                                      | ?                                                     | 30% Abnormal                               |
|                                          | Matas et al. (2010) <sup>[9]</sup>             | Case-control    | 25          | 25       | 34.88                         | 25-55                          | 76.0                 | RRMS                                             | 4.25 (?)                               | ?                                                     | Significantly different                    |
|                                          | Saberi et al. (2012) <sup>[11]</sup>           | Case-control    | 60          | 38       | 29.9                          | ?                              | 73.3                 | ?                                                | 3.2 (?)                                | ?                                                     | 20% Abnormal                               |
|                                          | Pokryszko-Dragan et al. (2015) <sup>[15]</sup> | Case-control    | 86          | 40       | 39.55                         | 19-60                          | 72.0                 | ?                                                | 8.57 (1-30)                            | ?                                                     | Significantly different                    |
|                                          | Kaytancı et al. (2016) <sup>[27]</sup>         | Cohort          | 20          | 20       | 31.3                          | ?                              | 55.0                 | ?                                                | ?                                      | ?                                                     | Significantly different                    |
|                                          | Di Mauro et al. (2019) <sup>[28]</sup>         | Cohort          | 40          | 40       | 37                            | 18-50                          | 60.0                 | RRMS                                             | 0.8 (0.8-2)                            | ?                                                     | No difference                              |
|                                          | Delphi et al. (2021) <sup>[33]</sup>           | Cross-sectional | 25          | 25       | 31.43                         | 18-45                          | 72.0                 | ?                                                | ?                                      | ?                                                     | Significantly different                    |
|                                          | Rishiq et al. (2021) <sup>[20]</sup>           | Case-control    | 11          | 9        | 49.5                          | 34-68                          | 72.7                 | RRMS (9), PPMS (1), SPMS (1)                     | 11.9 (2-30)                            | ?                                                     | Significantly different at high click rate |
| Srinivasan et al. (2021) <sup>[21]</sup> | Case-control                                   | 45              | 45          | 31.77    | 18-50                         | 73.3                           | RRMS                 | 6.1 (5.37)                                       | ?                                      | Significantly different and 55.56 % abnormal          |                                            |
| PTA                                      | Lewis et al. (2010) <sup>[8]</sup>             | Case-control    | 47          | 49       | 51.4                          | 21-65                          | 57.7 RRMS, 28.6 SPMS | RRMS (26), SPMS (21)                             | RRMS: 12.6 (2-43)<br>SPMS: 23.3 (8-50) | ?                                                     | Worse thresholds                           |
|                                          | Doty et al. (2012) <sup>[10]</sup>             | Case-control    | 73          | 73       | Males: 45.24<br>Females: 45.6 | ?                              | 71.2                 | RRMS (57), PPMS (3), SPMS (6), Unspecified (7)   | Males: 7.36 (?)<br>Females: 7.84 (?)   | ?                                                     | No significant difference                  |
|                                          | Saberi et al. (2012) <sup>[11]</sup>           | Case-control    | 60          | 38       | 29.9                          | ?                              | 73.3                 | ?                                                | 3.2 (?)                                | ?                                                     | Worse thresholds in female PwMS            |
|                                          | Di Mauro et al. (2019) <sup>[28]</sup>         | Cohort          | 40          | 40       | 37                            | 18-50                          | 60.0                 | RRMS                                             | 0.8 (0.8-2)                            | ?                                                     | No significant difference                  |
|                                          | Srinivasan et al. (2021) <sup>[21]</sup>       | Case-control    | 45          | 45       | 31.77                         | 18-50                          | 73.3                 | RRMS                                             | 6.1 (5.37)                             | ?                                                     | Significantly different                    |
| TEOAEs & DPOAEs                          | Saberi et al. (2012) <sup>[11]</sup>           | Case-control    | 60          | 38       | 29.9                          | ?                              | 73.3                 | ?                                                | 3.2 (?)                                | ?                                                     | No significant difference                  |
|                                          | Kaytancı et al. (2016) <sup>[27]</sup>         | Cohort          | 20          | 20       | 31.3                          | ?                              | 55.0                 | ?                                                | ?                                      | ?                                                     | No significant difference                  |
|                                          | Di Mauro et al. (2019) <sup>[28]</sup>         | Cohort          | 40          | 40       | 37                            | 18-50                          | 60.0                 | RRMS                                             | 0.8 (0.8-2)                            | ?                                                     | Significantly lower                        |

Gür, Binkhamis, Kluk (2022)

MS &amp; Audio-Vestibular System: Systematic Review

**Table S4 continued: Characteristics of studies examining the effects of MS on auditory function**

| Test Battery | Author (Year)                            | Study Type   | Sample Size |          | PwMS Mean Age (years) | PwMS Age range (Years) | % Female             | MS Type (sample size) | MS Duration Mean (range) years         | Results of PwMS compared to controls / normative data |
|--------------|------------------------------------------|--------------|-------------|----------|-----------------------|------------------------|----------------------|-----------------------|----------------------------------------|-------------------------------------------------------|
|              |                                          |              | PwMS        | Controls |                       |                        |                      |                       |                                        |                                                       |
| WDS          | Lewis et al. (2010) <sup>[8]</sup>       | Case-control | 47          | 49       | 51.4                  | 21-65                  | 57.7 RRMS, 28.6 SPMS | RRMS (26), SPMS (21)  | RRMS: 12.6 (2-43)<br>SPMS: 23.3 (8-50) | No significant difference                             |
|              | Valadbeigi et al. (2014) <sup>[14]</sup> | Case-control | 26          | 26       | 28.9                  | 18-40                  | ?                    | RRMS                  | ?                                      | Lower scores PwMS                                     |
|              | Elbeltagy et al. (2019) <sup>[19]</sup>  | Case-control | 20          | 20       | 37.6                  | 30-50                  | ?                    | RRMS                  | ?                                      | Significantly lower                                   |
| DPST         | Valadbeigi et al. (2014) <sup>[14]</sup> | Case-control | 26          | 26       | 28.9                  | 18-40                  | ?                    | RRMS                  | ?                                      | Significantly different                               |
| GIN          | Valadbeigi et al. (2014) <sup>[14]</sup> | Case-control | 26          | 26       | 28.9                  | 18-40                  | ?                    | RRMS                  | ?                                      | Significantly different                               |
|              | Elbeltagy et al. (2019) <sup>[19]</sup>  | Case-control | 20          | 20       | 37.6                  | 30-50                  | ?                    | RRMS                  | ?                                      | Significantly different                               |
| CAEP         | Japaridze et al. (2002) <sup>[11]</sup>  | Case-Control | 40          | 33       | 30.5                  | 18-57                  | 77.5                 | ?                     | ?                                      | 30% Abnormal                                          |
|              | Matas et al. (2010) <sup>[9]</sup>       | Case-control | 25          | 25       | 34.88                 | 25-55                  | 76.0                 | RRMS                  | 4.25 (?)                               | 16% Abnormal                                          |

Abbreviations: PTA= Pure Tone Audiometry, ABR= Auditory Brainstem Response, OAE= Oto-acoustic Emissions, TEOAE= Transient Evoked Oto acoustic emission, DPOAE= Distortion Product Oto acoustic Emissions, CAEP= Cortical Auditory Evoked Potentials, SCP= Slow Cortical Potentials, GIN= Gaps in Noise test, WDS= Word Discrimination Scores, DPST= Duration pattern sequence test, MS= Multiple Sclerosis, PwMS = Persons with Multiple Sclerosis, ? = not reported.

Cells shaded in grey represent test results that were abnormal or showed a difference between PwMS and Controls



Gür, Binkhamis, Kluk (2022)

MS &amp; Audio-Vestibular System: Systematic Review

## Extracted Pure Tone Audiometry Thresholds and Auditory Brainstem Response Results

**Table S5: Pure Tone Audiometry Thresholds**

| Author (Year)                            | Group           | Test Ear            | PTA Threshold Per Frequency (Hz) |       |           |       |           |       |           |       |           |       |           |       |           |       |
|------------------------------------------|-----------------|---------------------|----------------------------------|-------|-----------|-------|-----------|-------|-----------|-------|-----------|-------|-----------|-------|-----------|-------|
|                                          |                 |                     | 125                              |       | 250       |       | 500       |       | 1000      |       | 2000      |       | 4000      |       | 8000      |       |
|                                          |                 |                     | $\bar{x}$                        | SD    | $\bar{x}$ | SD    | $\bar{x}$ | SD    | $\bar{x}$ | SD    | $\bar{x}$ | SD    | $\bar{x}$ | SD    | $\bar{x}$ | SD    |
| Doty et al. (2012) <sup>[10]</sup>       | Male PwMS       | Average Across Ears | Not Tested                       |       | 15.87     | 5.39  | 14.05     | 5.94  | 12.52     | 7.43  | 12.79     | 8.97  | 20.03     | 11.71 | 17.02     | 17.26 |
|                                          | Male Controls   |                     |                                  | 14.35 | 8.24      | 15.90 | 8.68      | 15.53 | 8.58      | 17.74 | 8.93      | 22.77 | 16.08     | 20.23 | 22.49     |       |
|                                          | Female PwMS     |                     |                                  | 12.85 | 6.88      | 12.49 | 6.50      | 12.05 | 6.59      | 14.62 | 7.19      | 15.65 | 8.97      | 13.28 | 12.38     |       |
|                                          | Female Controls |                     |                                  | 11.28 | 7.77      | 12.52 | 7.60      | 10.45 | 6.82      | 11.62 | 8.17      | 13.92 | 8.79      | 12.65 | 12.60     |       |
| Di Mauro et al. (2019) <sup>[28]</sup>   | PwMS            | Right               | 10.30                            | 1.60  | 10.10     | 0.08  | 10.10     | 0.08  | 10.40     | 1.10  | 11.10     | 1.70  | 10.80     | 1.80  | 13.00     | 2.60  |
|                                          | Controls        | Right               | 10.90                            | 1.40  | 10.80     | 1.60  | 11.00     | 1.90  | 10.80     | 2.30  | 11.00     | 1.20  | 11.90     | 2.40  | 13.90     | 2.40  |
|                                          | PwMS            | Left                | 10.30                            | 1.70  | 10.90     | 1.20  | 10.40     | 1.90  | 10.40     | 1.30  | 10.80     | 1.10  | 11.40     | 1.70  | 12.50     | 2.20  |
|                                          | Controls        | Left                | 10.90                            | 1.40  | 10.80     | 1.60  | 11.00     | 1.30  | 10.90     | 2.10  | 11.10     | 1.90  | 11.90     | 2.80  | 13.90     | 2.40  |
| Srinivasan et al. (2021) <sup>[21]</sup> | PwMS            | Average Across Ears | Not Tested                       |       | 12.22     | 6.40  | 13.11     | 5.92  | 13.61     | 5.90  | 12.55     | 7.19  | 13.66     | 8.06  | 16.16     | 9.08  |
|                                          | Controls        |                     |                                  | 8.94  | 5.05      | 9.50  | 4.17      | 9.88  | 3.82      | 9.50  | 5.45      | 10.88 | 5.83      | 12.05 | 5.89      |       |

Abbreviations:

PwMS = Persons with Multiple Sclerosis, PTA = Pure Tone Audiometry,  $\bar{x}$  = Mean, SD = Standard Deviation

Gür, Binkhamis, Kluk (2022)

MS &amp; Audio-Vestibular System: Systematic Review

**Table S6: Auditory Brainstem Response Parameters and Results**

| Author<br>(Year)                                      | Click<br>Polarity -<br>Transducer    | ABR Parameters |              |      |               | Group    | Test Ear                  | Peak Latency (ms) |      |      |           |      |           | Interpeak Latencies (ms) |           |      |           |      |           | Peak Amplitude ( $\mu$ V) |           |      |           |
|-------------------------------------------------------|--------------------------------------|----------------|--------------|------|---------------|----------|---------------------------|-------------------|------|------|-----------|------|-----------|--------------------------|-----------|------|-----------|------|-----------|---------------------------|-----------|------|-----------|
|                                                       |                                      | PR             | PL           | Ave. | BP<br>Filter  |          |                           | I                 | III  | V    | I-III     |      | III-V     |                          | I-V       |      | I         |      | V         |                           |           |      |           |
|                                                       |                                      |                |              |      |               |          |                           |                   |      |      | $\bar{x}$ | SD   | $\bar{x}$ | SD                       | $\bar{x}$ | SD   | $\bar{x}$ | SD   | $\bar{x}$ | SD                        | $\bar{x}$ | SD   | $\bar{x}$ |
| Lima et al.<br>(2009) <sup>[7]</sup>                  | Rarefaction<br>- TDH 39<br>Headphone | 13.10          | 60 dB<br>SL* | 1024 | 100-<br>3000  | PwMS     | Right                     | 1.50              | 0.16 | 3.63 | 0.30      | 5.56 | 0.40      | 2.13                     | 0.22      | 1.93 | 0.31      | 4.06 | 0.33      | ?                         | ?         | ?    | ?         |
|                                                       |                                      |                |              |      |               |          | Left                      | 1.53              | 0.20 | 3.63 | 0.30      | 5.64 | 0.43      | 2.10                     | 0.31      | 2.01 | 0.29      | 4.11 | 0.39      | ?                         | ?         | ?    | ?         |
| Matas et al.<br>(2010) <sup>[9]</sup>                 | Rarefaction<br>- TDH 39<br>Headphone | 19.90          | 80 dB<br>nHL | 2000 | 100-<br>3000  | PwMS     | Average<br>Across<br>Ears | 1.53              | 0.13 | 3.72 | 0.31      | 5.78 | 0.37      | 2.21                     | 0.26      | 2.03 | 0.27      | 4.26 | 0.35      | ?                         | ?         | ?    | ?         |
|                                                       |                                      |                |              |      |               | Controls | 1.53                      | 0.07              | 3.57 | 0.09 | 5.50      | 0.45 | 2.04      | 0.06                     | 1.98      | 0.08 | 4.03      | 0.06 | ?         | ?                         | ?         | ?    |           |
| Pokryszko-<br>Dragan et<br>al. (2015) <sup>[15]</sup> | ? -<br>Earphone<br>unspecified       | 20.30          | 65 dB<br>SL* | 200  | 150-<br>3000  | PwMS     | Right                     | 1.72              | 0.19 | 3.88 | 0.33      | 5.81 | 0.81      | 2.18                     | 0.19      | 2.00 | 0.30      | 4.19 | 0.39      | 0.29                      | 0.18      | 0.37 | 0.20      |
|                                                       |                                      |                |              |      |               | Controls | 1.70                      | 0.14              | 3.85 | 0.16 | 5.73      | 0.23 | 2.14      | 0.12                     | 1.87      | 0.18 | 4.02      | 0.20 | 0.30      | 0.10                      | 0.46      | 0.19 |           |
|                                                       |                                      |                |              |      |               | PwMS     | Left                      | 1.68              | 0.12 | 3.87 | 0.17      | 5.77 | 0.73      | 2.19                     | 0.16      | 1.96 | 0.30      | 4.15 | 0.34      | 0.32                      | 0.14      | 0.40 | 0.24      |
|                                                       |                                      |                |              |      |               | Controls | 1.69                      | 0.13              | 3.83 | 0.12 | 5.70      | 0.21 | 2.13      | 0.14                     | 1.87      | 0.17 | 4.00      | 0.19 | 0.30      | 0.14                      | 0.44      | 0.16 |           |
| Kaytancı et<br>al. (2016) <sup>[27]</sup>             | ? - TDH 39<br>Headphone              | 13.00          | 70 dB<br>nHL | 1500 | 2000-<br>4000 | PwMS     | Right                     | 2.03              | 0.27 | 4.36 | 0.49      | 6.26 | 0.35      | 2.33                     | 0.49      | 1.90 | 0.28      | 4.23 | 0.42      | ?                         | ?         | ?    | ?         |
|                                                       |                                      |                |              |      |               | Controls | 1.45                      | 0.30              | 3.52 | 0.31 | 5.38      | 0.53 | 2.07      | 0.44                     | 1.85      | 0.48 | 3.92      | 0.53 | ?         | ?                         | ?         | ?    |           |
|                                                       |                                      |                |              |      |               | PwMS     | Left                      | 1.86              | 0.24 | 4.41 | 0.39      | 6.25 | 0.43      | 2.54                     | 0.34      | 1.84 | 0.20      | 4.38 | 0.43      | ?                         | ?         | ?    | ?         |
|                                                       |                                      |                |              |      |               | Controls | 1.47                      | 0.24              | 3.40 | 0.43 | 5.39      | 0.46 | 1.92      | 0.48                     | 1.99      | 0.53 | 3.91      | 0.47 | ?         | ?                         | ?         | ?    |           |
| Delphi et al.<br>(2021) <sup>[33]</sup>               | Rarefaction<br>- ?                   | 9.00           | 70 dB<br>nHL | ?    | 30-<br>3000   | PwMS     | Right                     | 1.89              | 0.11 | 4.25 | 0.14      | 6.32 | 0.13      | 2.30                     | 0.11      | 2.21 | 0.09      | 4.48 | 0.13      | ?                         | ?         | ?    | ?         |
|                                                       |                                      |                |              |      |               | Controls | 1.87                      | 0.14              | 4.01 | 0.13 | 5.79      | 0.14 | 2.17      | 0.09                     | 1.99      | 0.13 | 4.12      | 0.11 | ?         | ?                         | ?         | ?    |           |
|                                                       |                                      |                |              |      |               | PwMS     | Left                      | 1.80              | 0.15 | 4.30 | 0.15      | 6.19 | 0.14      | 2.29                     | 0.08      | 2.19 | 0.14      | 4.51 | 0.11      | ?                         | ?         | ?    | ?         |
|                                                       |                                      |                |              |      |               | Controls | 1.79                      | 0.11              | 3.96 | 0.13 | 5.87      | 0.15 | 2.15      | 0.14                     | 1.96      | 0.08 | 4.09      | 0.14 | ?         | ?                         | ?         | ?    |           |
| Srinivasan<br>et al.<br>(2021) <sup>[21]</sup>        | Rarefaction<br>- Insert<br>earphones | 21.10          | 80 dB<br>nHL | 1500 | 100-<br>3000  | PwMS     | Average<br>Across<br>Ears | 1.44              | 0.18 | 3.61 | 0.40      | 5.63 | 0.73      | 2.17                     | 0.38      | 2.03 | 0.50      | 4.19 | 0.70      | ?                         | ?         | ?    | ?         |
|                                                       |                                      | Controls       |              |      |               | 1.43     | 0.16                      | 3.48              | 0.19 | 5.30 | 0.24      | 2.04 | 0.17      | 1.82                     | 0.18      | 3.86 | 0.21      | ?    | ?         | ?                         | ?         |      |           |
|                                                       |                                      | 80.10          |              |      |               | PwMS     | Average<br>Across<br>Ears | ?                 | ?    | ?    | ?         | 6.12 | 0.72      | ?                        | ?         | ?    | ?         | ?    | ?         | ?                         | ?         | ?    |           |
|                                                       |                                      | Controls       |              |      |               | ?        | ?                         | ?                 | ?    | 5.76 | 0.27      | ?    | ?         | ?                        | ?         | ?    | ?         | ?    | ?         | ?                         | ?         |      |           |

Abbreviations:

PR = Presentation Rate, PL = Presentation Level, Ave. = Number of Averages, BP = Band Pass,  $\bar{x}$  = Mean, SD = Standard Deviation, dB SL = Decibels Sensation Level, dB nHL = Decibels normal Hearing Level, PwMS = Persons with Multiple Sclerosis, IA Diff. = Inter-aural Difference, ? = not reported.

\* dB SL reference to hearing thresholds (did not specify hearing thresholds to click or to pure tones)

Gür, Binkhamis, Kluk (2022)

MS &amp; Audio-Vestibular System: Systematic Review

## Section IV: Multiple Sclerosis and Vestibular Function

**Table S7. Characteristics of studies examining the effects of MS on vestibular function**

| Test Battery                              | Author (Year)                               | Study Type      | Sample Size |          | Mean Age PwMS (years)                              | PwMS Age range (Years) | % Female | MS Type (sample size) | MS Duration Mean (range) years | Results of PwMS compared to controls / normative data |
|-------------------------------------------|---------------------------------------------|-----------------|-------------|----------|----------------------------------------------------|------------------------|----------|-----------------------|--------------------------------|-------------------------------------------------------|
|                                           |                                             |                 | PwMS        | Controls |                                                    |                        |          |                       |                                |                                                       |
| cVEMP                                     | Sartucci & Logi (2002) <sup>[21]</sup>      | Case-Control    | 15          | 15       | 44.5                                               | 26-59                  | 66.6     | ?                     | ?                              | Significantly different                               |
|                                           | Versino et al. (2002) <sup>[23]</sup>       | Cohort          | 70          | 18       | 35.5                                               | 19-61                  | ?        | ?                     | ?                              | 31.4% Abnormal                                        |
|                                           | Alpini et al. (2004) <sup>[31]</sup>        | Case-control    | 40          | 25       | 38                                                 | 17-71                  | 57.5     | ?                     | ?                              | 70% Abnormal                                          |
|                                           | Aidar and Suzuki (2005) <sup>[4]</sup>      | Case-control    | 15          | 15       | 39.3                                               | ?                      | ?        | ?                     | ?                              | Significantly different                               |
|                                           | Patkó et al. (2007) <sup>[5]</sup>          | Case-control    | 30          | 30       | 43.4                                               | 27-60                  | 66.6     | ?                     | ?                              | Significantly different                               |
|                                           | Eleftheriadou et al. (2009) <sup>[25]</sup> | Cohort          | 46          | 40       | 40                                                 | 20-66                  | 45.6     | RRMS                  | 4.6 (?)                        | Significantly different                               |
|                                           | Gabelić et al. (2013) <sup>[12]</sup>       | Case control    | 30          | 15       | ?                                                  | ?                      | 46.6     | RRMS                  | 3.93 (0.2-21)                  | Significantly different                               |
|                                           | Harirchian et al. (2013) <sup>[13]</sup>    | Case-control    | 20          | 20       | 30                                                 | 20-40                  | 50       | RRMS<br>SPMS          | ?                              | 70% Abnormal                                          |
|                                           | Parsa et al. (2015) <sup>[29]</sup>         | Cross-sectional | 34          | 15       | 29.8                                               | ?                      | 100      | ?                     | ?                              | Significantly different                               |
|                                           | Kavasoğlu et al. (2018) <sup>[17]</sup>     | Case-control    | 30          | 31       | 30                                                 | 18-45                  | 60.0     | ?                     | < 1 (?)                        | 23.3% Abnormal<br>No significant difference           |
|                                           | Koura and Hussein (2018) <sup>[18]</sup>    | Case-control    | 20          | 10       | 36.80                                              | ?                      | 65.0     | ?                     | 4.4 (?)                        | 100% Abnormal                                         |
|                                           | Delphi et al. (2021) <sup>[33]</sup>        | Cross-sectional | 25          | 25       | 31.43                                              | 18-45                  | 72.0     | ?                     | ?                              | Significantly different                               |
|                                           | Elmoazen et al. (2021) <sup>[22]</sup>      | Case-control    | 20          | 10       | Brainstem lesions: 40<br>No Brainstem lesion: 34.1 | ?                      | ?        | ?                     | ?                              | Significantly different                               |
| Cochrane et al. (2021) <sup>[34,35]</sup> | Cross-sectional                             | 40              | 20          | 42.4     | 21-55                                              | 88.0                   | RRMS     | 9.9                   | No significant difference      |                                                       |
| oVEMP                                     | Gabelić et al. (2013) <sup>[12]</sup>       | Case control    | 30          | 15       | ?                                                  | ?                      | 46.6     | RRMS                  | 3.93 (0.2-21)                  | Significantly different                               |
|                                           | Parsa et al. (2015) <sup>[29]</sup>         | Cross-sectional | 34          | 15       | 29.8                                               | ?                      | 100      | ?                     | ?                              | Significantly different                               |
|                                           | Elmoazen et al. (2021) <sup>[22]</sup>      | Case-control    | 20          | 10       | Brainstem lesions: 40<br>No Brainstem lesion: 34.1 | ?                      | ?        | ?                     | ?                              | Significantly different                               |
|                                           | Cochrane et al. (2021) <sup>[34,35]</sup>   | Cross-sectional | 40          | 20       | 42.4                                               | 21-55                  | 88.0     | RRMS                  | 9.9                            | No significant difference                             |
| ENG                                       | Zeigelboim et al. (2008) <sup>[6]</sup>     | Case-control    | 30          | 0        | 42.23                                              | 27-64                  | 80       | RRMS                  | ?                              | 86.7% Abnormal                                        |
|                                           | Degirmenci et al. (2010) <sup>[26]</sup>    | Cohort          | 30          | 30       | 37.9                                               | 23-56                  | 56.7     | RRMS                  | ?                              | 90% Abnormal                                          |

Gür, Binkhamis, Kluk (2022)

MS &amp; Audio-Vestibular System: Systematic Review

**Table S7 continued: Characteristics of studies examining the effects of MS on vestibular function**

| Test Battery          | Author (Year)                             | Study Type      | Sample Size |          | Mean Age PwMS (years)         | PwMS Age range (Years) | % Female | MS Type (sample size) | MS Duration Mean (range) years     | Results of PwMS compared to controls / normative data |
|-----------------------|-------------------------------------------|-----------------|-------------|----------|-------------------------------|------------------------|----------|-----------------------|------------------------------------|-------------------------------------------------------|
|                       |                                           |                 | PwMS        | Controls |                               |                        |          |                       |                                    |                                                       |
| Dynamic Posturography | Doty et al. (2018) <sup>[16]</sup>        | Case-control    | 58          | 72       | Males:44.61<br>Females: 44.60 | ?                      | 68.9     | ?                     | Male: 7.03 (?)<br>Female: 6.54 (?) | Significantly different                               |
| Static Posturography  | Inojosa et al. (2020) <sup>[31,32]</sup>  | Cross-sectional | 99          | 30       | 35.01                         | 18-50                  | 68.7     | ?                     | 5.5 (?)                            | Significantly different                               |
|                       | Yang and Liu (2020) <sup>[30]</sup>       | Cross-sectional | 30          | 25       | 50.8                          | ?                      | 76.7     | ?                     | 14 (?)                             | Significantly different                               |
| Rotary Chair          | Cochrane et al. (2021) <sup>[34,35]</sup> | Cross-sectional | 40          | 20       | 42.4                          | 21-55                  | 88.0     | RRMS                  | 9.9                                | Significantly different                               |

Abbreviations: cVEMP = Cervical Vestibular Evoked Myogenic Potentials, oVEMP = Ocular Vestibular Evoked Myogenic Potentials, MS= Multiple Sclerosis, PwMS = Persons with Multiple Sclerosis, ? = not reported. Cells shaded in grey represent test results that were abnormal or showed a difference between PwMS and Controls.

Gür, Binkhamis, Kluk (2022)

MS &amp; Audio-Vestibular System: Systematic Review

## Extracted Vestibular Evoked Myogenic Potentials Results

**Table S8: Ocular Vestibular Evoked Myogenic Potentials Parameters and Results**

| Author (Year)                          | Stimulus (polarity) - Transducer                         | PR (Hz) | PL         | Ave. | BP Filter (Hz) | Group                              | Side                 | Peak Latency (ms) |      |           |       | Amplitude (µV) |      |
|----------------------------------------|----------------------------------------------------------|---------|------------|------|----------------|------------------------------------|----------------------|-------------------|------|-----------|-------|----------------|------|
|                                        |                                                          |         |            |      |                |                                    |                      | n1                |      | p1        |       | n1-p1          |      |
|                                        |                                                          |         |            |      |                |                                    |                      | $\bar{x}$         | SD   | $\bar{x}$ | SD    | $\bar{x}$      | SD   |
| Gabelić et al. (2013) <sup>[12]</sup>  | Click (?) - Headphone                                    | 1       | 130 dB SPL | 100  | 5-1000         | PwMS                               | Average Across sides | 10.30             | ?    | 14.90     | ?     | 13.10          | ?    |
|                                        |                                                          |         |            |      |                | Controls                           |                      | 9.5               | ?    | 14        | ?     | 13.3           | ?    |
| Parsa et al. (2015) <sup>[29]</sup>    | 500 Hz Tone Burst (?) - Insert earphones                 | ?       | 95 db nHL  | ?    | ?              | PwMS with infratentorial plaque    | Right                | 15.67             | 1.32 | 20.59     | 1.65  | 6.61           | 0.88 |
|                                        |                                                          |         |            |      |                | PwMS without infratentorial plaque |                      | 12.21             | 1.00 | 16.90     | 1.32  | 6.61           | 0.60 |
|                                        |                                                          |         |            |      |                | Controls                           | 10.2                 | 0.48              | 15.1 | 0.87      | 12.77 | 4.12           |      |
|                                        |                                                          |         |            |      |                | PwMS with infratentorial plaque    | Left                 | 15.74             | 1.66 | 21.40     | 2.88  | 6.48           | 0.68 |
|                                        |                                                          |         |            |      |                | PwMS without infratentorial plaque |                      | 11.78             | 0.89 | 16.92     | 0.82  | 6.82           | 0.75 |
|                                        |                                                          |         |            |      |                | Controls                           |                      | 10.3              | 0.51 | 14.9      | 0.84  | 12.6           | 4.04 |
| Elmoazen et al. (2021) <sup>[22]</sup> | 500 Hz Tone Burst (condensation) -Supra aural headphones | 5       | 95 dB nHL  | 150  | 1-1000         | PwMS with Brainstem lesions        | Average Across sides | 11.43             | 1.42 | 16.86     | 1.79  | 3.59           | 3.82 |
|                                        |                                                          |         |            |      |                | PwMS without Brainstem lesions     |                      | 10.58             | 2.50 | 15.81     | 1.42  | 3.22           | 2.00 |
|                                        |                                                          |         |            |      |                | Controls                           |                      | 10.09             | 0.92 | 14.71     | 1.20  | 2.76           | 1.28 |
| Cochrane et al. (2021) <sup>[34]</sup> | Unspecified Tone Burst (?) - earphone unspecified        | ?       | ?          | 100  | ?              | PwMS                               | ?                    | 8.50              | 1.70 | 12.90     | 2.20  | 5.20           | 3.50 |
|                                        |                                                          |         |            |      |                | Controls                           |                      | 8.40              | 1.50 | 12.30     | 2.10  | 4.70           | 2.50 |

Abbreviations:

PR = Presentation Rate, PL = Presentation Level, Ave. = Number of Averages, BP = Band Pass,  $\bar{x}$  = Mean, SD = Standard Deviation, dB SPL = Decibels Sound Pressure Level, dB nHL = Decibels normal Hearing Level, PwMS = Persons with Multiple Sclerosis, ? = not reported.

Gür, Binkhamis, Kluk (2022)

MS &amp; Audio-Vestibular System: Systematic Review

**Table S9: Cervical Vestibular Evoked Myogenic Potentials Parameters and Results**

| Author (Year)                               | Stimulus (polarity) - Transducer | PR (Hz) | PL                                          | Ave. | BP Filter (Hz) | Group    | Side                 | Peak Latency (ms)                     |                       |           |            | Amplitude ( $\mu$ V) |        |      |          |      |       |      |      |     |
|---------------------------------------------|----------------------------------|---------|---------------------------------------------|------|----------------|----------|----------------------|---------------------------------------|-----------------------|-----------|------------|----------------------|--------|------|----------|------|-------|------|------|-----|
|                                             |                                  |         |                                             |      |                |          |                      | p13                                   |                       | n23       |            | p13-n23              |        |      |          |      |       |      |      |     |
|                                             |                                  |         |                                             |      |                |          |                      | $\bar{x}$                             | SD                    | $\bar{x}$ | SD         | $\bar{x}$            | SD     |      |          |      |       |      |      |     |
| Sartucci and Logi (2002) <sup>[2]</sup>     | Click (Rarefaction) - Headphone  | 3       | 140 dB SPL                                  | 256  | 10-1500        | PwMS     | Right                | 15.30                                 | 3.10                  | 22.50     | 2.30       | 63.00                | 65.50  |      |          |      |       |      |      |     |
|                                             |                                  |         |                                             |      |                |          |                      | 12.5                                  | 0.8                   | 21.3      | 1.5        | 186.4                | 82.8   |      |          |      |       |      |      |     |
|                                             |                                  |         |                                             |      |                |          | Left                 | 14.00                                 | 2.30                  | 20.80     | 2.30       | 73.10                | 58.80  |      |          |      |       |      |      |     |
|                                             |                                  |         |                                             |      |                |          |                      | 12.3                                  | 0.9                   | 20.8      | 1.3        | 141.1                | 85.8   |      |          |      |       |      |      |     |
| Alpini et al. (2004) <sup>[3]</sup>         | Click (Rarefaction) - Headphone  | 5       | 95 dB nHL + 70 dB SPL contralateral Masking | 400  | ?              | PwMS     | Right                | 14.40                                 | ?                     | 22.40     | ?          | ?                    | ?      |      |          |      |       |      |      |     |
|                                             |                                  |         |                                             |      |                |          | Left                 | 14.90                                 | ?                     | 22.50     | ?          | ?                    | ?      |      |          |      |       |      |      |     |
|                                             |                                  |         |                                             |      |                |          | Right                | 13.40                                 | 2.87                  | 18.64     | 2.67       | 12.17                | 6.50   |      |          |      |       |      |      |     |
|                                             |                                  |         |                                             |      |                |          |                      | 11.12                                 | 1.64                  | 15.15     | 2.51       | 7.54                 | 5.95   |      |          |      |       |      |      |     |
| Aidar and Suzuki (2005) <sup>[4]</sup>      | Click (Rarefaction) - Headphone  | 2       | 95 dB HL                                    | 200  | 20-1000        | PwMS     | Right                | 13.49                                 | 1.77                  | 17.84     | 1.27       | 13.30                | 3.63   |      |          |      |       |      |      |     |
|                                             |                                  |         |                                             |      |                |          |                      | 10.76                                 | 1.59                  | 14.86     | 2.85       | 7.23                 | 4.76   |      |          |      |       |      |      |     |
|                                             |                                  |         |                                             |      |                |          | Left                 | 14.40                                 | 1.50                  | 21.30     | 3.20       | 11.61                | 3.63   |      |          |      |       |      |      |     |
|                                             |                                  |         |                                             |      |                |          |                      | 12.7                                  | 1.5                   | 21.3      | 3.7        | 16.02                | 5.34   |      |          |      |       |      |      |     |
| Patkó et al. (2007) <sup>[5]</sup>          | Click (Rarefaction) - Headphone  | 5       | 133 dB SPL                                  | 250  | 10-1600        | PwMS     | Right                | 14.8                                  | 1.5                   | 21.2      | 3.2        | 11.07                | 2.87   |      |          |      |       |      |      |     |
|                                             |                                  |         |                                             |      |                |          |                      | 12.9                                  | 1.9                   | 20.7      | 2.8        | 13.85                | 4.3    |      |          |      |       |      |      |     |
|                                             |                                  |         |                                             |      |                |          | Left                 | PwMS with brainstem lesions           | 15.48                 | 1.40      | 23.94      | 1.51                 | ?      | ?    |          |      |       |      |      |     |
|                                             |                                  |         |                                             |      |                |          |                      | PwMS without brainstem lesions        | 14.56                 | 1.20      | 23.25      | 1.42                 | ?      | ?    |          |      |       |      |      |     |
| Eleftheriadou et al. (2009) <sup>[25]</sup> | Click (Rarefaction) - Headphone  | 5       | 105 dB HL                                   | 250  | 5-1500         | Controls | Average across sides | 12.67                                 | 1.1                   | 21.66     | 1.11       | ?                    | ?      |      |          |      |       |      |      |     |
|                                             |                                  |         |                                             |      |                |          |                      | Gabelić et al. (2013) <sup>[12]</sup> | Click (?) - Headphone | 1         | 130 dB SPL | 100                  | 5-1000 | PwMS | 15.80    | ?    | 24.90 | ?    | 1.90 | ?   |
|                                             |                                  |         |                                             |      |                |          |                      |                                       |                       |           |            |                      |        |      | Controls | 14.6 | ?     | 22.1 | ?    | 1.6 |
| Harirchian et al. (2013) <sup>[13]</sup>    | Click (Rarefaction) - Headphone  | 2       | 95 dB nHL + 40 dB nHL contralateral Masking | 200  | 10-1000        | PwMS     | Right                | 22.20                                 | 9.30                  | 30.02     | 11.20      | ?                    | ?      |      |          |      |       |      |      |     |
|                                             |                                  |         |                                             |      |                |          |                      | 12.9                                  | 1.4                   | 21.3      | 1.6        | ?                    | ?      |      |          |      |       |      |      |     |
|                                             |                                  |         |                                             |      |                |          | Left                 | PwMS                                  | 20.20                 | 7.05      | 30.71      | 16.20                | ?      | ?    |          |      |       |      |      |     |
|                                             |                                  |         |                                             |      |                |          |                      | Controls                              | 13.1                  | 1.9       | 20.6       | 1.9                  | ?      | ?    |          |      |       |      |      |     |
|                                             |                                  |         |                                             |      |                |          | IA Diff.             | PwMS                                  | 2.05                  | 8.80      | 0.70       | 10.90                | ?      | ?    |          |      |       |      |      |     |
|                                             |                                  |         |                                             |      |                |          |                      | Controls                              | 0.17                  | 2.2       | 0.4        | 2.5                  | ?      | ?    |          |      |       |      |      |     |

Gür, Binkhamis, Kluk (2022)

MS &amp; Audio-Vestibular System: Systematic Review

**Table S9 Continued: Cervical Vestibular Evoked Myogenic Potentials Parameters and Results**

| Author (Year)                               | Stimulus (polarity)<br>- Trasducer                             | PR (Hz) | PL         | Ave. | BP<br>Filter<br>(Hz) | Group | Side                       | Peak Latency (ms)                  |       |           |       | Amplitude ( $\mu$ V) |        |        |
|---------------------------------------------|----------------------------------------------------------------|---------|------------|------|----------------------|-------|----------------------------|------------------------------------|-------|-----------|-------|----------------------|--------|--------|
|                                             |                                                                |         |            |      |                      |       |                            | p13                                |       | n23       |       | p13-n23              |        |        |
|                                             |                                                                |         |            |      |                      |       |                            | $\bar{x}$                          | SD    | $\bar{x}$ | SD    | $\bar{x}$            | SD     |        |
| Parsa et al.<br>(2015) <sup>[29]</sup>      | 500 Hz Tone Burst<br>(?) -Insert<br>earphones                  | ?       | 95 db nHL  | ?    | ?                    |       | Right                      | PwMS with infratentorial plaque    | 18.75 | 1.81      | 28.15 | 1.43                 | 118.82 | 29.97  |
|                                             |                                                                |         |            |      |                      |       |                            | PwMS without infratentorial plaque | 17.44 | 1.03      | 26.89 | 1.87                 | 135.00 | 20.31  |
|                                             |                                                                |         |            |      |                      |       |                            | Controls                           | 15.25 | 0.9       | 24.55 | 1.07                 | 180    | 44.97  |
|                                             |                                                                |         |            |      |                      |       |                            | PwMS with infratentorial plaque    | 19.11 | 1.72      | 28.88 | 2.27                 | 119.65 | 26.02  |
|                                             |                                                                |         |            |      |                      |       |                            | PwMS without infratentorial plaque | 17.21 | 1.05      | 26.87 | 1.36                 | 133.78 | 22.89  |
|                                             |                                                                |         |            |      |                      |       |                            | Controls                           | 15.31 | 0.93      | 24.48 | 1.18                 | 175    | 57.59  |
| Kavasoğlu et al.<br>(2017) <sup>[17]</sup>  | Click (Rarefaction)<br>- Headphone                             | 5       | 100 dB nHL | 100  | 10-<br>1000          |       | Right                      | PwMS                               | 12.90 | 2.10      | 21.20 | 1.78                 | 7.10   | 2.80   |
|                                             |                                                                |         |            |      |                      |       |                            | Controls                           | 12    | 0.9       | 20.6  | 1.95                 | 7.7    | 3.1    |
|                                             |                                                                |         |            |      |                      |       |                            | PwMS                               | 12.90 | 2.20      | 21.40 | 2.10                 | 7.00   | 2.50   |
|                                             |                                                                |         |            |      |                      |       |                            | Controls                           | 12.03 | 0.96      | 20.76 | 1.63                 | 7.6    | 3      |
| Koura and Hussein<br>(2018) <sup>[18]</sup> | 500 Hz Tone Burst<br>(Rarefaction) -TDH<br>39 Headphones       | 5.1     | 95 db HL   | 200  | ?                    |       | Right                      | PwMS                               | 17.14 | 0.71      | 26.82 | 0.84                 | 41.88  | 1.71   |
|                                             |                                                                |         |            |      |                      |       |                            | Controls                           | 13.83 | 1.14<br>5 | 20.76 | 3.43                 | 61.18  | 34.64  |
|                                             |                                                                |         |            |      |                      |       |                            | PwMS                               | 17.20 | 0.56      | 27.17 | 0.75                 | 54.95  | 28.27  |
|                                             |                                                                |         |            |      |                      |       |                            | Controls                           | 14.43 | 0.70<br>2 | 22.3  | 1.725                | 65.74  | 18.51  |
| Delphi et al.<br>(2021) <sup>[33]</sup>     | 500 Hz Tone Burst (?)<br>-?                                    | 5.1     | 95 dB nHL  | ?    | 10-<br>1200          |       | Right                      | PwMS                               | 18.20 | 1.93      | 27.37 | 2.45                 | 121.34 | 29.05  |
|                                             |                                                                |         |            |      |                      |       |                            | Controls                           | 14.96 | 1.02      | 24.21 | 2.10                 | 169.21 | 48.76  |
|                                             |                                                                |         |            |      |                      |       |                            | PwMS                               | 18.95 | 2.01      | 27.21 | 2.80                 | -      | -      |
|                                             |                                                                |         |            |      |                      |       |                            | Controls                           | 15.02 | 1.10      | 24.12 | 2.30                 | -      | -      |
| Elmoazen et al.<br>(2021) <sup>[22]</sup>   | 500 Hz Tone Burst<br>(condensation) -Supra<br>aural headphones | 5       | 95 dB nHL  | 150  | 1-<br>1000           |       | Average<br>across<br>sides | PwMS with Brainstem lesions        | 16.49 | 1.49      | 25.96 | 1.93                 | 66.25  | 52.42  |
|                                             |                                                                |         |            |      |                      |       |                            | PwMS without Brainstem lesions     | 15.21 | 1.57      | 23.97 | 2.06                 | 93.12  | 78.01  |
|                                             |                                                                |         |            |      |                      |       |                            | Controls                           | 14.05 | 0.94      | 23.36 | 2.14                 | 144.42 | 122.73 |
| Cochrane et al.<br>(2021) <sup>[34]</sup>   | Unspecified Tone<br>Burst (?) – earphone<br>unspecified        | ?       | ?          | ?    | ?                    |       | ?                          | PwMS                               | 13.70 | 1.30      | 21.10 | 2.60                 | 12.70  | 7.60   |
|                                             |                                                                |         |            |      |                      |       |                            | Controls                           | 13.30 | 0.50      | 20.60 | 1.80                 | 16.50  | 7.10   |

Abbreviations:

PR = Presentation Rate, PL = Presentation Level, Ave. = Number of Averages, BP = Band Pass,  $\bar{x}$  = Mean, SD = Standard Deviation, dB SPL = Decibels Sound Pressure Level, dB HL = Decibels Hearing Level, dB nHL = Decibels normal Hearing Level, PwMS = Persons with Multiple Sclerosis, IA Diff. = Inter-aural Difference, ? = not reported. Cells Highlighted in Yellow indicate that "normalized amplitudes" were reported as opposed to absolute amplitudes reported by other studies. Cells Highlighted in Green indicate results were reported without specifying side or if they are averaged across sides.

Gür, Binkhamis, Kluk (2022)

MS &amp; Audio-Vestibular System: Systematic Review

1 Japaridze G, Shakarishvili R, Kevanishvili Z. Auditory brainstem, middle-latency, and slow cortical responses in multiple sclerosis. *Acta Neurol Scand* 2002;**106**:47–53. doi:10.1034/j.1600-0404.2002.01226.x

2 Sartucci F, Logi F. Vestibular-evoked myogenic potentials: A method to assess vestibulo-spinal conduction in multiple sclerosis patients. *Brain Res Bull* 2002;**59**:59–63. doi:10.1016/s0361-9230(02)00842-0

3 Alpini D, Pugnetti L, Caputo D, *et al.* Vestibular evoked myogenic potentials in multiple sclerosis: clinical and imaging correlations. *Mult Scler* 2004;**10**:316–21. doi:10.1191/1352458504ms1041oa

4 Aidar RC, Suzuki FA. Vestibular evoked myogenic potential: new perspectives in multiple sclerosis. *Braz J Otorhinolar* 2005;**71**:48–54. doi:10.1016/s1808-8694(15)31284-2

5 Patkó T, Simó M, Arányi Z. Vestibular click-evoked myogenic potentials: sensitivity and factors determining abnormality in patients with multiple sclerosis. *Mult Scler J* 2007;**13**:193–8. doi:10.1177/1352458506070940

6 Zeigelboim BS, Arruda WO, Mangabeira-Albernaz PL, *et al.* Vestibular findings in relapsing, remitting multiple sclerosis: a study of thirty patients. *Int Tinnitus J* 2008;**14**:139–45.

7 Lima TMA, Crato AN, Mancini PC, *et al.* Alterations in early auditory evoked potentials in multiple sclerosis patients. *Braz J Otorhinolar* 2009;**75**:177–81. doi:10.1016/s1808-8694(15)30775-8

8 Lewis MS, Lilly DJ, Hutter MM, *et al.* Audiometric hearing status of individuals with and without multiple sclerosis. *J Rehabilitation Res Dev* 2010;**47**:669–78. doi:10.1682/jrrd.2010.01.0010

9 Matas CG, Matas SL de A, Oliveira CRS de, *et al.* Auditory evoked potentials and multiple sclerosis. *Arq Neuro-psiquiat* 2010;**68**:528–34. doi:10.1590/s0004-282x2010000400010

10 Doty RL, Tourbier I, Davis S, *et al.* Pure-Tone Auditory Thresholds Are Not Chronically Elevated in Multiple Sclerosis. *Behav Neurosci* 2012;**126**:314–24. doi:10.1037/a0027046

11 Saberi A, Hatamian HR, Nemati S, *et al.* Hearing statement in multiple sclerosis: a case control study using auditory brainstem responses and otoacoustic emissions. *Acta Medica Iranica* 2012;**50**:679–83.

12 Gabeli T, Krbot M, Šefer AB, *et al.* Ocular and Cervical Vestibular Evoked Myogenic Potentials in Patients With Multiple Sclerosis. *J Clin Neurophysiol* 2013;**30**:86–91. doi:10.1097/wnp.0b013e31827eda0c

13 Harirchian MH, Karimi N, Nafisi S, *et al.* Vestibular evoked myogenic potential for diagnoses of multiple sclerosis: is it beneficial? *Medicinski Glasnik Official Publ Medical Assoc Zenica-doboj Canton Bosnia Herzegovina* 2013;**10**:321–6.



Gür, Binkhamis, Kluk (2022)

MS &amp; Audio-Vestibular System: Systematic Review

- 14 Valadbeigi A, Weisi F, Rohbakhsh N, *et al.* Central auditory processing and word discrimination in patients with multiple sclerosis. *Eur Arch Oto-rhino-l* 2014;**271**:2891–6. doi:10.1007/s00405-013-2776-6
- 15 Pokryszko-Dragan A, Bilinska M, Gruszka E, *et al.* Assessment of visual and auditory evoked potentials in multiple sclerosis patients with and without fatigue. *Neurol Sci* 2015;**36**:235–42. doi:10.1007/s10072-014-1953-8
- 16 Doty RL, MacGillivray MR, Talab H, *et al.* Balance in multiple sclerosis: relationship to central brain regions. *Exp Brain Res* 2018;**236**:2739–50. doi:10.1007/s00221-018-5332-1
- 17 Kavasoglu G, Gökçay F, Yüceyar N, *et al.* Cervical vestibular-evoked myogenic potentials in patients with multiple sclerosis: sensitive in detecting brainstem involvement? *Neurol Sci* 2018;**39**:365–71. doi:10.1007/s10072-017-3215-z
- 18 Koura R, Hussein M. Vestibular-evoked myogenic potential: an easy neurophysiological tool for evaluating brain stem involvement in multiple sclerosis. *Egypt J Otolaryngology* 2018;**34**:144–8. doi:10.4103/ejo.ejo\_73\_17
- 19 Elbeltagy R, Gad N, Ismail M. Central auditory function in multiple sclerosis patients. *Indian J Otology* 2019;**25**:90–6. doi:10.4103/indianjotol.indianjotol\_80\_18
- 20 Rishiq D, Harkrider A, Springer C, *et al.* Click-evoked and speech-evoked auditory brainstem responses from individuals with multiple sclerosis. *Neurosci Lett* 2021;**740**:135460. doi:10.1016/j.neulet.2020.135460
- 21 Srinivasan VS, Krishna R, Munirathinam BR. Effectiveness of Brainstem Auditory Evoked Potentials Scoring in Evaluating Brainstem Dysfunction and Disability Among Individuals With Multiple Sclerosis. *Am J Audiol* 2021;**30**:255–65. doi:10.1044/2020\_aja-20-00155
- 22 Elmoazen D, Kozou H, Gawies M, *et al.* Assessment of Cervical and Ocular Vestibular Evoked Myogenic Potentials in Multiple Sclerosis PatientsS. *Egyptian Journal of Ear, Nose, Throat and Allied Sciences* 2021;**22**:1–9. doi:10.21608/ejentas.2020.44108.1262
- 23 Versino M, Colnaghi S, Callieco R, *et al.* Vestibular evoked myogenic potentials in multiple sclerosis patients. *Clin Neurophysiol* 2002;**113**:1464–9. doi:10.1016/s1388-2457(02)00155-4
- 24 Burina A, Sinanović O, Smajlović D, *et al.* Some Aspects of Balance Disorder in Patients with Multiple Sclerosis. *Bosnian J Basic Med* 2008;**8**:80–5. doi:10.17305/bjbms.2008.3003
- 25 Eleftheriadou A, Deftereos SN, Zarikas V, *et al.* The diagnostic value of earlier and later components of Vestibular Evoked Myogenic Potentials (VEMP) in Multiple Sclerosis. *J Vestib Res* 2009;**19**:59–66. doi:10.3233/ves-2009-0342
- 26 Degirmenci E, Bir LS, Ardic FN. Clinical and electronystagmographical evaluation of vestibular symptoms in relapsing remitting multiple sclerosis. *Neurol Res* 2010;**32**:986–91. doi:10.1179/016164110x12681290831405

Gür, Binkhamis, Kluk (2022)

MS &amp; Audio-Vestibular System: Systematic Review

- 27 Kaytancı E, Ozdamar OI, Acar GO, *et al.* Evaluation of transiently evoked otoacoustic emissions and auditory brainstem responses in patients with multiple sclerosis. *Ear Nose Throat J* 2016;**95**:E12–7.
- 28 Di Mauro RD, Di Girolamo SD, Ralli M, *et al.* Subclinical cochlear dysfunction in newly diagnosed relapsing-remitting multiple sclerosis. *Mult Scler Relat Dis* 2019;**33**:55–60. doi:10.1016/j.msard.2019.05.020
- 29 Parsa MS, Mohammadkhani G, Hajabolhassani F, *et al.* Cervical and ocular vestibular evoked myogenic potentials in multiple sclerosis participants. *Medical J Islamic Repub Iran* 2015;**29**:164.
- 30 Yang F, Liu X. Relative importance of vision and proprioception in maintaining standing balance in people with multiple sclerosis. *Mult Scler Relat Dis* 2020;**39**:101901. doi:10.1016/j.msard.2019.101901
- 31 Inojosa H, Schriefer D, Klöditz A, *et al.* Balance Testing in Multiple Sclerosis—Improving Neurological Assessment With Static Posturography? *Front Neurol* 2020;**11**:135. doi:10.3389/fneur.2020.00135
- 32 Inojosa H, Schriefer D, Trentzsch K, *et al.* Visual Feedback and Postural Control in Multiple Sclerosis. *J Clin Medicine* 2020;**9**:1291. doi:10.3390/jcm9051291
- 33 Delphi M, Sayaf M, Taheri F, *et al.* Audio and vestibular analyses in patient with multiple sclerosis: a case–control study. *Hear Balance Commun* 2021;**19**:1–6. doi:10.1080/21695717.2021.1933318
- 34 Cochrane GD, Christy JB, Motl RW. Comprehensive Clinical Assessment of Vestibular Function in Multiple Sclerosis. *J Neurol Phys Ther* 2021;**45**:228–34. doi:10.1097/npt.0000000000000358
- 35 Cochrane GD, Christy JB, Sandroff BM, *et al.* Cognitive and Central Vestibular Functions Correlate in People With Multiple Sclerosis. *Neurorehab Neural Re* 2021;**35**:1030–8. doi:10.1177/15459683211046268
